# Supplementary material
Source: PubMed Central journal article supplement (PMC7911095)
Supplement: jama-e212747-s001.pdf [file jama-e212747-s001.pdf]

## Supplemental Online Content

Janiaud P, Axfors C, Schmitt AM, et al. Association of convalescent plasma treatment with clinical outcomes in patients with COVID-19: a systematic review and meta-analysis. *JAMA*. doi:10.1001/jama.2021.2747

**eMethods.** Literature search strategies

**eFigure 1.** Flowchart of the literature search

**eFigure 2.** Forest plots with summary effect sizes per publication type for A) all-cause mortality, B) Length of hospitalization, and C) Mechanical ventilation requirement

**eFigure 3.** Association of convalescent plasma with A) study-defined clinical improvement and B) study-defined clinical deterioration for peer-reviewed and preprint trials (no pooling due to heterogeneity of outcome definitions)

**eFigure 4.** Serious adverse events reported in peer-reviewed and preprint trials (no pooling due to heterogeneity of outcome definitions)

**eTable 1.** Outcomes reported by trials

**eTable 2.** Sensitivity analyses

**eTable 3.** GRADE assessment

This supplemental material has been provided by the authors to give readers additional information about their work.

## **eMethods.** Literature search strategies

### **1. PubMed (January 29, 2021)**

We used a PRESS-reviewed search strategy (Peer-Reviewed of Electronic Search Strategies). Search terms for PubMed included extensive controlled vocabulary and Medical Subject Headings (MeSH):

```
#1 corona[ti] OR covid*[ti] OR sars[ti] OR severe acute respiratory syndrome[ti] OR ncov*[ti] OR "severe acute respiratory syndrome coronavirus 2" [Supplementary Concept] OR "COVID-19" [Supplementary Concept] OR (wuhan[tiab] AND coronavirus[tiab]) OR (wuhan[tiab] AND pneumonia virus[tiab]) OR COVID19[tiab] OR COVID-19[tiab] OR coronavirus 2019[tiab] OR SARS-CoV-2[tiab] OR SARS2[tiab] OR SARS-2[tiab] OR "severe acute respiratory syndrome 2"[tiab] OR 2019-nCoV[tiab] OR (novel coronavirus[tiab] AND 2019[tiab]) NOT (animals[mesh] NOT humans[mesh]) AND ("2019/12/01"[EDAT] : "3000/12/31"[EDAT])
```

```
#2 (((plasma[MeSH Terms]) OR (serum[MeSH Terms])) OR (plasma[Title/Abstract])) OR (serum[Title/Abstract]) OR (convalescen*[Title/Abstract])
```

```
#3 (randomized controlled trial[pt] OR controlled clinical trial[pt] OR randomized[tiab] OR placebo[tiab] OR clinical trials as topic[mesh:noexp] OR randomly[tiab] OR trial[ti] NOT (animals[mh] NOT humans [mh]))
```

```
#1 AND #2 AND #3
```

### **2. Cochrane COVID-19 trial registry (January 31, 2021)**

Search terms were “convalescent OR plasma”, and we will use the filter categories “Intervention assignment” (“randomised”), “Study aim” (“Treatment and management”), and “Study type” (“Intervention”).

### **3. L·OVE Platform – Epistemonikos (January 29, 2021)**

We used the filter categories “Prevention and treatment”, “Procedures - convalescent plasma”, and within the primary studies we will select the filters “by reported data - has data” and “by type of study - RCT”.

### **4. Google (January 29, 2021)**

We also searched the grey literature using the search string: "convalescent plasma" AND "press release" AND "COVID" on Google. We screened the first 30 hits.

### **5. Other sources**

Finally, we complemented our results with trials identified by other published or registered systematic searches as well as personal knowledge.

**eFigure 1.** Flowchart of the literature search

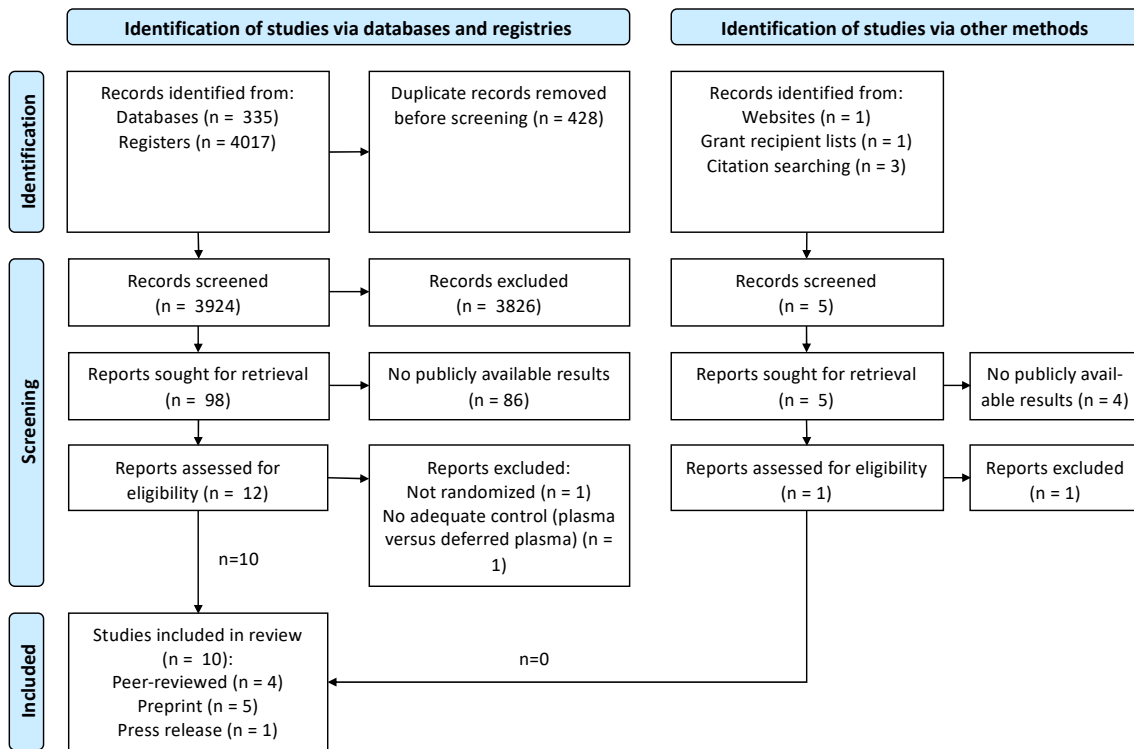

**Figure 2.** Forest plots with summary effect sizes per publication type for A) all-cause mortality, B) Length of hospitalization, and C) Mechanical ventilation requirement

A) All-cause mortality

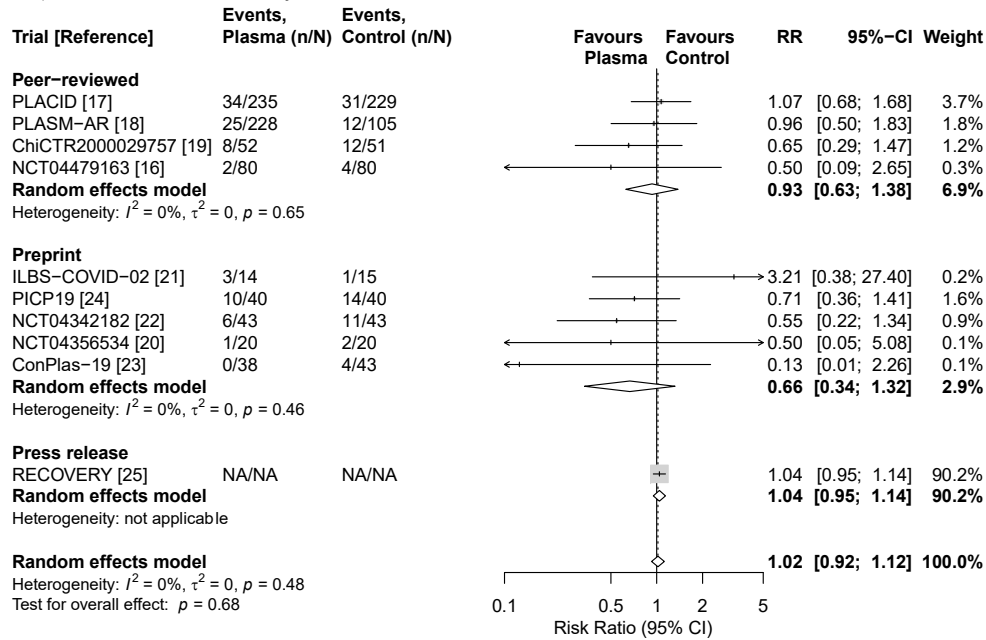

## B) Length of hospitalization

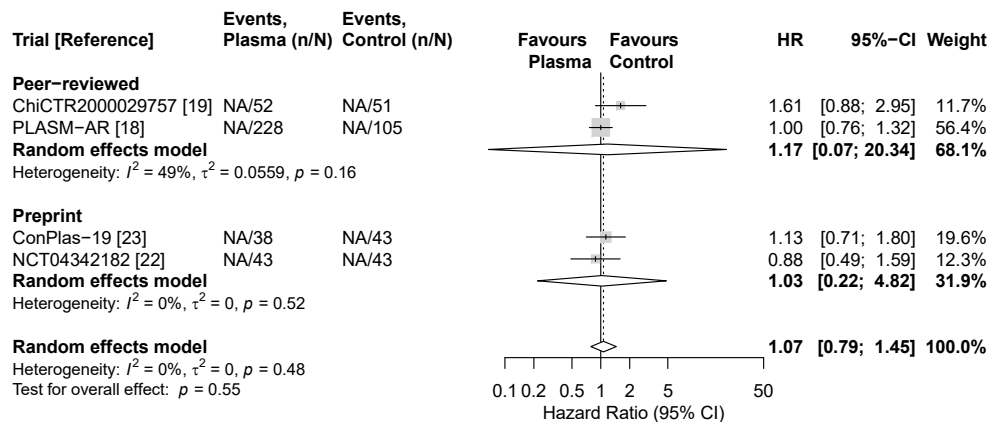

## C) Mechanical ventilation requirement

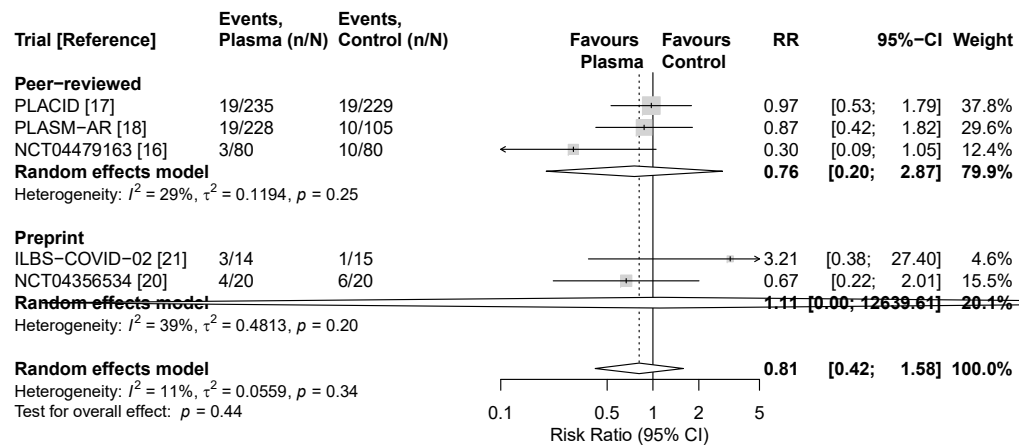

**Figure 3.** Association of convalescent plasma with A) study-defined clinical improvement and B) study-defined clinical deterioration for peer-reviewed and preprint trials (no pooling due to heterogeneity of outcome definitions)

**A) Study-defined clinical improvement**

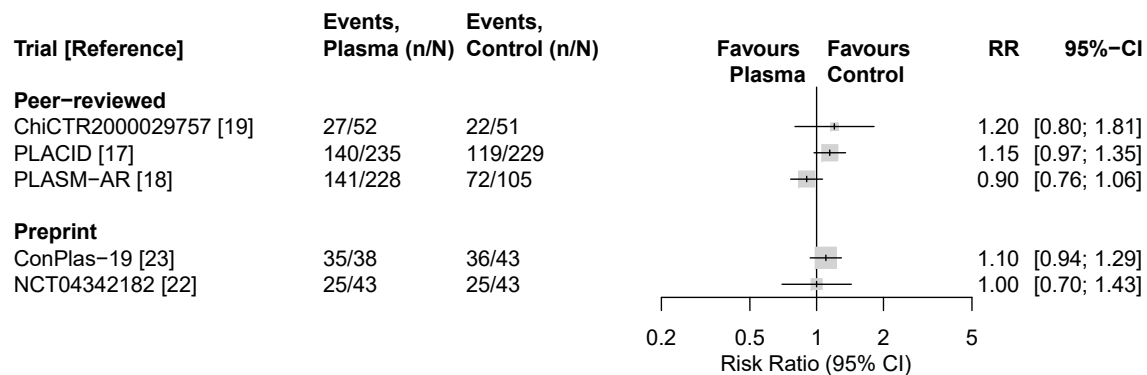

**B) Study-defined clinical deterioration**

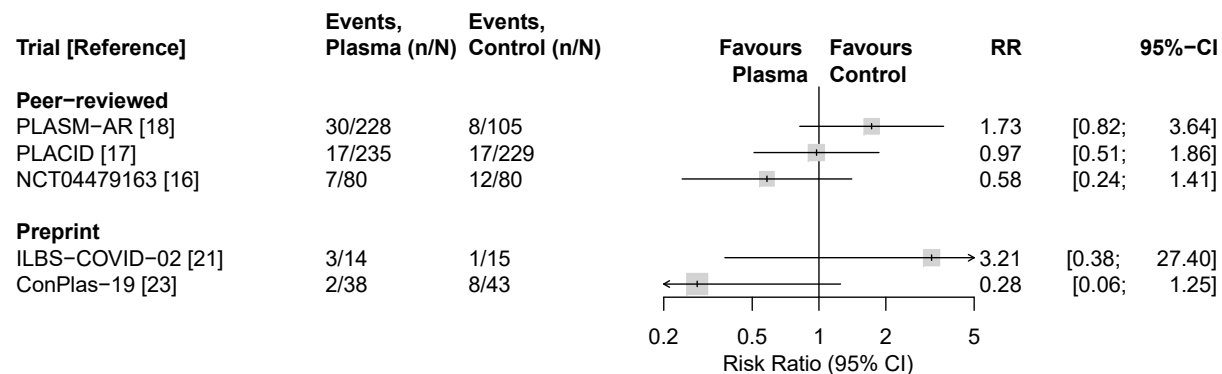

**eFigure 4.** Serious adverse events reported in peer-reviewed and preprint trials (no pooling due to heterogeneity of outcome definitions)<sup>a</sup>

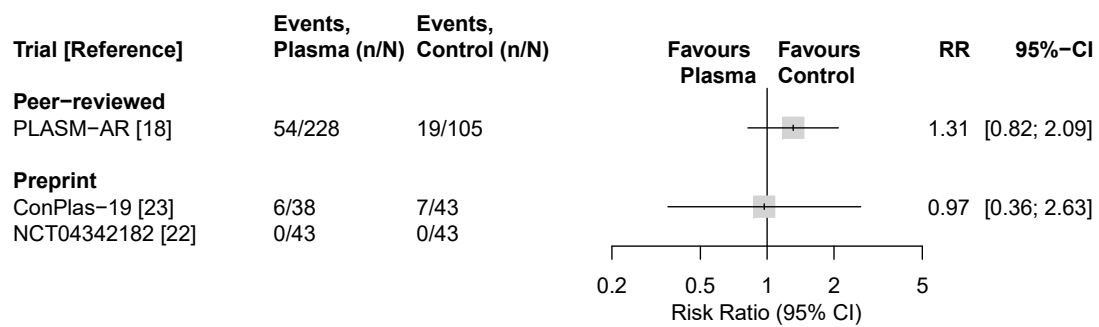

<sup>a</sup>NCT04342182 only reported the plasma-related serious adverse events.

**eTable 1.** Outcomes reported by trials

| Trial                  | PLASM-AR<br>(NCT04383535)                                                | PLACID<br>(CTRI/2020/04/024775)                                                                                                                                       | ChiCTR2000029757                                                                                                                                                                         | NCT04479163                                                                                                                                                                            | NCT04356534                                             | ILBS-COVID-02<br>(NCT04346446)                                  | NCT04342182                           | ConPlas-19<br>(NCT04345523)                                                                                                                      | PICP19<br>(CTRI/2020/05/025209) | RECOVERY<br>(NCT04381936) |
|------------------------|--------------------------------------------------------------------------|-----------------------------------------------------------------------------------------------------------------------------------------------------------------------|------------------------------------------------------------------------------------------------------------------------------------------------------------------------------------------|----------------------------------------------------------------------------------------------------------------------------------------------------------------------------------------|---------------------------------------------------------|-----------------------------------------------------------------|---------------------------------------|--------------------------------------------------------------------------------------------------------------------------------------------------|---------------------------------|---------------------------|
| Publication format     | Journal                                                                  | Journal                                                                                                                                                               | Journal                                                                                                                                                                                  | Journal                                                                                                                                                                                | Preprint                                                | Preprint                                                        | Preprint                              | Preprint                                                                                                                                         | Preprint                        | Press release             |
| Peer-reviewed          | yes                                                                      | yes                                                                                                                                                                   | yes                                                                                                                                                                                      | yes                                                                                                                                                                                    | no                                                      | no                                                              | no                                    | no                                                                                                                                               | no                              | no                        |
| Trial primary outcome  | Ordinal scale of clinical status (from 1/death to 6/recovered) at day 30 | Composite of progression to severe disease (pao2/fio2 <100 mm hg) or all-cause mortality at 28 days fio2 <100 mm hg) or all-cause mortality at 28 days post-enrolment | Time to clinical improvement                                                                                                                                                             | Severe respiratory disease, defined as a respiratory rate of 30 breaths per minute or more, an oxygen saturation of less than 93% while the patient was breathing ambient air, or both | Requirement for ventilation (invasive and non-invasive) | Proportion of patients remaining free of mechanical ventilation | Mortality                             | Disease severity scale (proportion of patients in categories 5, 6 or 7 of the covid-19 ordinal scale (death or any kind of ventilation or ECMO)) | Mortality                       | Mortality                 |
| Outcome definition     |                                                                          |                                                                                                                                                                       |                                                                                                                                                                                          |                                                                                                                                                                                        |                                                         |                                                                 |                                       |                                                                                                                                                  |                                 |                           |
| Mortality              | 30 days                                                                  | 28 days                                                                                                                                                               | 28 days                                                                                                                                                                                  | 15 and 25 days                                                                                                                                                                         | NR                                                      | 28 days                                                         | 60 days                               | 15 to 29 days                                                                                                                                    | 30 days                         | 28 days                   |
| Clinical improvement   | Discharged with full return to baseline function                         | Resolution of shortness of breath                                                                                                                                     | Patient discharged alive or reduction of 2 points on a 6-point disease severity scale (ranging from 1 [discharge] to 6 [death]) severity scale (ranging from 1 [discharge] to 6 [death]) | NR                                                                                                                                                                                     | NR                                                      | NR                                                              | WHO Covid-19 severity score at day 15 | Time to improvement of one category on the ordinal scale                                                                                         | NA                              | NR                        |
| Clinical deterioration | Discharged without full return to baseline function                      | Progression to severe disease                                                                                                                                         | NR                                                                                                                                                                                       | Life-threatening respiratory disease, critical systemic illness, or death, alone or in combination                                                                                     | NR                                                      | Vasopressor requirement                                         | NR                                    | One-category worsening in any of the daily assessments                                                                                           | NR                              | NR                        |



| Trial                               | PLASM-AR<br>(NCT04383535)                                | PLACID<br>(CTRI/2020/04/024775)                                                                                        | ChiCTR2000029757  | NCT04479163                    | NCT04356534                                                                                                                                                                                  | ILBS-COVID-02<br>(NCT04346446) | NCT04342182                                                                                                                    | ConPlas-19<br>(NCT04345523)                                                | PICP19<br>(CTRI/2020/05/025209) | RECOVERY<br>(NCT04381936) |
|-------------------------------------|----------------------------------------------------------|------------------------------------------------------------------------------------------------------------------------|-------------------|--------------------------------|----------------------------------------------------------------------------------------------------------------------------------------------------------------------------------------------|--------------------------------|--------------------------------------------------------------------------------------------------------------------------------|----------------------------------------------------------------------------|---------------------------------|---------------------------|
| Mechanical ventilation <sup>a</sup> | Invasive                                                 | Invasive or non-invasive                                                                                               | NR                | Any, invasive and non-invasive | Any                                                                                                                                                                                          | Invasive                       | NR                                                                                                                             | NR                                                                         | NR                              | NR                        |
| Length of hospitalization           | Median IQR and HR                                        | Median IQR                                                                                                             | Median IQR and HR | NR                             | NR                                                                                                                                                                                           | Mean SD                        | HR                                                                                                                             | Median 95%CI, HR                                                           | Median                          | NR                        |
| Serious adverse events              | Common Terminology Criteria for Adverse Events version 5 | Death and invasive mechanical ventilation, hemodynamic instability within 6 hours of CP transfusion (no data reported) | NR                | NR                             | Death, life-threatening, requirement of hospitalization or prolonged hospitalization, persistent or significant disability/incapacity, congenital anomaly or birth defect (no data reported) | NR                             | Death from any cause or a life-threatening transfusion reaction (only data reported for plasma-related serious adverse events) | AE grade 3 and 4 (Medical Dictionary For Regulatory Activities Version 21) | NR                              | NR                        |

**eTable 2.** Sensitivity analyses

| Outcome                                   | Model              | ES (95% CI) <sup>a</sup> | Heterogeneity I <sup>2</sup> ; tau <sup>2</sup> |
|-------------------------------------------|--------------------|--------------------------|-------------------------------------------------|
| <b><i>Peer reviewed only</i></b>          |                    |                          |                                                 |
| Mortality                                 | HKSJ-PM            | 0.93 [0.63; 1.38]        | 0.00%; 0.00                                     |
|                                           | HKSJ-SJ            | 0.90 [0.59; 1.38]        | 0.00%; 0.03                                     |
|                                           | Fixed effect       | 0.93 [0.67; 1.29]        | 0.00%; 0.00                                     |
|                                           | Profile likelihood | 1.02 [0.77; 1.12]        | NA%; 0.00                                       |
| Length of hospitalization                 | HKSJ-PM            | 1.17 [0.07; 20.34]       | 49.27%; 0.06                                    |
|                                           | HKSJ-SJ            | 1.17 [0.07; 20.37]       | 49.27%; 0.06                                    |
|                                           | Fixed effect       | 1.09 [0.84; 1.40]        | 49.27%; 0.06                                    |
|                                           | Profile likelihood | 1.07 [0.86; 1.39]        | NA%; 0.00                                       |
| Mechanical ventilation                    | HKSJ-PM            | 0.76 [0.20; 2.87]        | 28.89%; 0.12                                    |
|                                           | HKSJ-SJ            | 0.73 [0.18; 2.97]        | 28.89%; 0.20                                    |
|                                           | Fixed effect       | 0.81 [0.52; 1.26]        | 28.89%; 0.07                                    |
|                                           | Profile likelihood | 0.83 [0.51; 1.25]        | NA%; 0.00                                       |
| <b><i>Peer reviewed and preprints</i></b> |                    |                          |                                                 |
| Mortality                                 | HKSJ-PM            | 1.02 [0.92; 1.12]        | 0.00%; 0.00                                     |
|                                           | HKSJ-SJ            | 0.82 [0.59; 1.14]        | 0.00%; 0.21                                     |
|                                           | Fixed effect       | 1.02 [0.93; 1.11]        | 0.00%; 0.00                                     |
|                                           | Profile likelihood | 1.02 [0.77; 1.12]        | NA%; 0.00                                       |
| Length of hospitalization                 | HKSJ-PM            | 1.07 [0.79; 1.45]        | 0.00%; 0.00                                     |
|                                           | HKSJ-SJ            | 1.09 [0.77; 1.54]        | 0.00%; 0.03                                     |
|                                           | Fixed effect       | 1.07 [0.87; 1.31]        | 0.00%; 0.00                                     |
|                                           | Profile likelihood | 1.07 [0.86; 1.39]        | NA%; 0.00                                       |
| Mechanical ventilation                    | HKSJ-PM            | 0.81 [0.42; 1.58]        | 11.27%; 0.06                                    |
|                                           | HKSJ-SJ            | 0.80 [0.36; 1.78]        | 11.27%; 0.32                                    |
|                                           | Fixed effect       | 0.83 [0.56; 1.24]        | 11.27%; 0.03                                    |
|                                           | Profile likelihood | 0.83 [0.51; 1.25]        | NA%; 0.00                                       |

<sup>a</sup>All are risk ratios (RRs) except for length of hospitalization which are hazard ratios (HRs)

HKSJ-PM: Hartung-Knapp adjustment for random effects model, Paule-Mandel estimator for tau<sup>2</sup>;

HKSJ-SJ: Hartung-Knapp adjustment for random effects model, Sidik-Jonkman estimator for tau<sup>2</sup>;

Fixed effect: inverse variance-weighted fixed-effect model

Profile likelihood: Profile likelihood method with random effects model, likelihood-based confidence intervals

**eTable 3.** GRADE assessment

**A) All-cause mortality**

| Quality assessment                                                   |                   |                                      |                          |                         |                           |                               | No of patients      |                | Effect                 |                          | Quality       | Importance |
|----------------------------------------------------------------------|-------------------|--------------------------------------|--------------------------|-------------------------|---------------------------|-------------------------------|---------------------|----------------|------------------------|--------------------------|---------------|------------|
| No of studies                                                        | Design            | Risk of bias                         | Inconsistency            | Indirectness            | Imprecision               | Other considerations          | Convalescent plasma | Control        | Relative (95% CI)      | Absolute risk difference |               |            |
| <b>All-cause mortality (peer-reviewed)</b>                           |                   |                                      |                          |                         |                           |                               |                     |                |                        |                          |               |            |
| 4                                                                    | randomized trials | no serious risk of bias              | no serious inconsistency | no serious indirectness | very serious <sup>a</sup> | None                          | 69/595 (11.6%)      | 59/465 (12.7%) | RR 0.93 (0.63 to 1.38) | -1.21% [-5.29%; 2.88%]   | ⊕⊕⊕⊕ LOW      | CRITICAL   |
| <b>All-cause mortality (peer-reviewed, preprints, press-release)</b> |                   |                                      |                          |                         |                           |                               |                     |                |                        |                          |               |            |
| 10                                                                   | randomized trials | no serious risk of bias <sup>b</sup> | no serious inconsistency | no serious indirectness | No serious imprecision    | Unpublished data <sup>c</sup> | NA                  | NA             | RR 1.02 (0.92 to 1.12) | NA                       | ⊕⊕⊕⊕ MODERATE | CRITICAL   |

NA: number of events and total patients in each arm could not be reported as not available for RECOVERY

<sup>a</sup>Imprecision was downgraded by 2 levels because the 95% of the relative risk (RR) was sufficiently wide that the estimate could either include appreciable harm or benefit of the intervention (thresholds: 0.75 and 1.25).

<sup>b</sup>Although there were some concerns for two trials (NCT04356534 and ConPlas-19) and one (PICP19) at high risk of bias, they contributed little to the overall treatment effect estimate.

<sup>c</sup>RECOVERY data come from a press release and so additional data would be warranted to fully assess its potential effect on the overall treatment effect estimate and on the other quality assessment domains.

**B) Length of hospitalization**

| Quality assessment                                          |                   |                                   |                          |                         |                           |                      | No of patients      |         | Effect                  |                          | Quality  | Importance |
|-------------------------------------------------------------|-------------------|-----------------------------------|--------------------------|-------------------------|---------------------------|----------------------|---------------------|---------|-------------------------|--------------------------|----------|------------|
| No of studies                                               | Design            | Risk of bias                      | Inconsistency            | Indirectness            | Imprecision               | Other considerations | Convalescent plasma | Control | Relative (95% CI)       | Absolute risk difference |          |            |
| <b>Length of hospitalization (peer-reviewed)</b>            |                   |                                   |                          |                         |                           |                      |                     |         |                         |                          |          |            |
| 2                                                           | randomized trials | no serious risk of bias           | no serious inconsistency | no serious indirectness | very serious <sup>a</sup> | None                 | NA                  | NA      | HR 1.77 (0.07 to 20.34) | NA                       | ⊕⊕⊕⊕ LOW | CRITICAL   |
| <b>Length of hospitalization (peer-reviewed, preprints)</b> |                   |                                   |                          |                         |                           |                      |                     |         |                         |                          |          |            |
| 4                                                           | randomized trials | serious risk of bias <sup>b</sup> | no serious inconsistency | no serious indirectness | very serious <sup>a</sup> | None                 | NA                  | NA      | HR 1.07 (0.79 to 1.45)  | NA                       | ⊕⊕⊕⊕ LOW | CRITICAL   |

NA: number of events and total patients in each group could not be reported as only hazard ratios were available for each trial.

<sup>a</sup>Imprecision was downgraded by 2 levels because the 95% of the relative risk (RR) was sufficiently wide that the estimate could either include appreciable harm or benefit of the intervention (thresholds: 0.75 and 1.25).

<sup>b</sup>Some concerns for ConPlas-19 as unclear whether the randomization process was concealed

### C) Mechanical ventilation requirement

| Quality assessment                                       |                   |                                   |                          |                         |                           |                      | No of patients      |                | Effect                 |                          | Quality  | Importance |
|----------------------------------------------------------|-------------------|-----------------------------------|--------------------------|-------------------------|---------------------------|----------------------|---------------------|----------------|------------------------|--------------------------|----------|------------|
| No of studies                                            | Design            | Risk of bias                      | Inconsistency            | Indirectness            | Imprecision               | Other considerations | Convalescent plasma | Control        | Relative (95% CI)      | Absolute risk difference |          |            |
| <b>Mechanical ventilation (peer-reviewed)</b>            |                   |                                   |                          |                         |                           |                      |                     |                |                        |                          |          |            |
| 3                                                        | randomized trials | no serious risk of bias           | no serious inconsistency | no serious indirectness | very serious <sup>a</sup> | None                 | 41/543 (7.5%)       | 39/414 (9.4%)  | RR 0.76 (0.20 to 2.87) | -2.56% [-13.16%; 8.05%]  | ⊕⊕○○ LOW | CRITICAL   |
| <b>Mechanical ventilation (peer-reviewed, preprints)</b> |                   |                                   |                          |                         |                           |                      |                     |                |                        |                          |          |            |
| 5                                                        | randomized trials | serious risk of bias <sup>b</sup> | no serious inconsistency | no serious indirectness | very serious <sup>a</sup> | None                 | 48/577 (8.3%)       | 46/449 (10.2%) | RR 0.81 (0.42 to 1.58) | -2.21% [-8.94%; 4.51%]   | ⊕⊕○○ LOW | CRITICAL   |

<sup>a</sup>Imprecision was downgraded by 2 levels because the 95% of the relative risk (RR) was sufficiently wide that the estimate could either include appreciable harm or benefit of the intervention (thresholds: 0.75 and 1.25).

<sup>b</sup>Some concerns for NCT04356534 as unclear whether the randomization process was concealed
